# Supplementary material for: Multimorbidity prediction using link prediction
Source: PubMed Central journal article supplement (PMC8360941; doi:10.1038/s41598-021-95802-0), 2021-08-12
Supplement: 41598_2021_95802_MOESM1_ESM.pdf [file 41598_2021_95802_MOESM1_ESM.pdf]

# Supplementary Material:

## Multimorbidity prediction using link prediction

### Baseline Algorithms

| Index | Unipartite Graph                                                                                                                                            | Bipartite graph                                                                                                                                             |
|-------|-------------------------------------------------------------------------------------------------------------------------------------------------------------|-------------------------------------------------------------------------------------------------------------------------------------------------------------|
| CN    | $Z_{uv}^{CN} =  \{\Gamma(x) \cap \Gamma(y)\} $                                                                                                              | $S_{uv}^{CN} =  \{\widehat{\Gamma}(x) \cap \Gamma(y)\} \cup \{\Gamma(x) \cap \widehat{\Gamma}(y)\} $                                                        |
| JC    | $Z_{uv}^{JC} = \frac{Z_{uv}^{CN}}{ \Gamma(x) \cup \Gamma(y) }$                                                                                              | $S_{uv}^{JC} = \frac{S_{uv}^{CN}}{ \Gamma(x) \cup \Gamma(y) }$                                                                                              |
| AA    | $Z_{uv}^{AA} = \sum_{z \in \{\{\widehat{\Gamma}(x) \cap \Gamma(y)\} \cup \{\Gamma(x) \cap \widehat{\Gamma}(y)\}\}} \frac{1}{\log_2  \Gamma(z) }$            | $S_{uv}^{AA} = \sum_{z \in \{\{\widehat{\Gamma}(x) \cap \Gamma(y)\} \cup \{\Gamma(x) \cap \widehat{\Gamma}(y)\}\}} \frac{1}{\log_2  \Gamma(z) }$            |
| RA    | $Z_{uv}^{RA} = \sum_{z \in \{\{\widehat{\Gamma}(x) \cap \Gamma(y)\} \cup \{\Gamma(x) \cap \widehat{\Gamma}(y)\}\}} \frac{1}{ \Gamma(z) }$                   | $S_{uv}^{RA} = \sum_{z \in \{\{\widehat{\Gamma}(x) \cap \Gamma(y)\} \cup \{\Gamma(x) \cap \widehat{\Gamma}(y)\}\}} \frac{1}{ \Gamma(z) }$                   |
| PA    | $Z_{uv}^{PA} =  \Gamma(x)  \times  \Gamma(y) $                                                                                                              | $S_{uv}^{PA} =  \Gamma(x)  \times  \Gamma(y) $                                                                                                              |
| LCL   | $Z_{uv}^{LCL} =  \{(u, v) : (u, v) \in E, u \in \Gamma(y), v \in \Gamma(x)\} $                                                                              | $S_{uv}^{LCL} =  \{(u, v) : (u, v) \in E, u \in \Gamma(y), v \in \Gamma(x)\} $                                                                              |
| CAR   | $Z_{uv}^{CAR} = Z_{uv}^{CN} \times Z_{uv}^{LCL}$                                                                                                            | $S_{uv}^{CAR} = S_{uv}^{CN} \times S_{uv}^{LCL}$                                                                                                            |
| CJC   | $Z_{uv}^{CJC} = \frac{Z_{uv}^{CAR}}{ \Gamma(x) \cup \Gamma(y) }$                                                                                            | $S_{uv}^{CJC} = \frac{S_{uv}^{CAR}}{ \Gamma(x) \cup \Gamma(y) }$                                                                                            |
| CAA   | $Z_{uv}^{CAA} = \sum_{z \in \{\{\widehat{\Gamma}(x) \cap \Gamma(y)\} \cup \{\Gamma(x) \cap \widehat{\Gamma}(y)\}\}} \frac{ \gamma(z) }{\log_2  \Gamma(z) }$ | $S_{uv}^{CAA} = \sum_{z \in \{\{\widehat{\Gamma}(x) \cap \Gamma(y)\} \cup \{\Gamma(x) \cap \widehat{\Gamma}(y)\}\}} \frac{ \gamma(z) }{\log_2  \Gamma(z) }$ |
| CRA   | $Z_{uv}^{CRA} = \sum_{z \in \{\{\widehat{\Gamma}(x) \cap \Gamma(y)\} \cup \{\Gamma(x) \cap \widehat{\Gamma}(y)\}\}} \frac{ \gamma(z) }{ \Gamma(z) }$        | $S_{uv}^{CRA} = \sum_{z \in \{\{\widehat{\Gamma}(x) \cap \Gamma(y)\} \cup \{\Gamma(x) \cap \widehat{\Gamma}(y)\}\}} \frac{ \gamma(z) }{ \Gamma(z) }$        |
| CPA   | $Z_{uv}^{CPA} =  \Gamma(x)  \times  \Gamma(y) $                                                                                                             | $S_{uv}^{CPA} =  \Gamma(x)  \times  \Gamma(y) $                                                                                                             |

Table S1: A list of baseline algorithms for unipartite and bipartite graphs. Here  $\gamma(z)$  is the local community degree of  $z$  and corresponds to  $LCL$ .

## Example of data split

In the following figure, we have explained how the observed links in a bipartite networks are partitioned into train and probe sets.

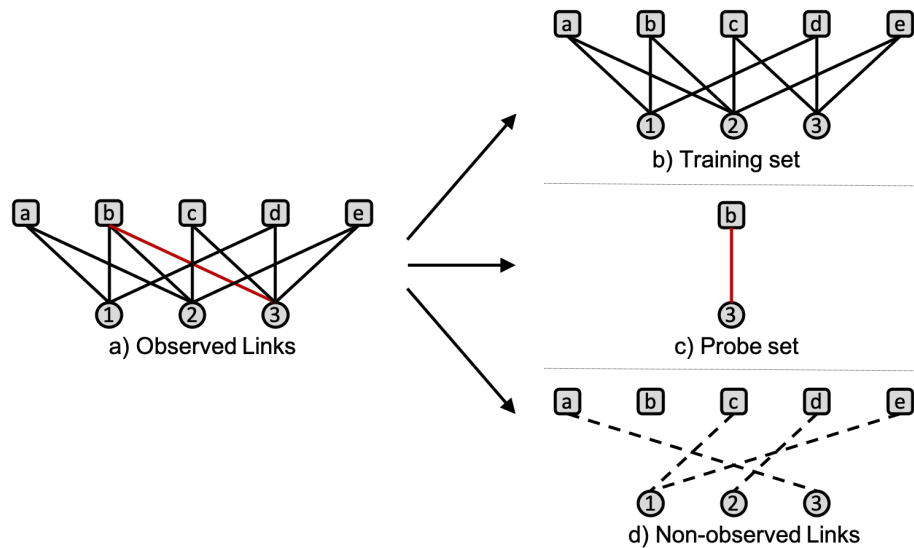

Figure S1: A simple example of the splitting the observed links  $E$  into training set  $E^T$  and probe set  $E^P$  is performed. Note that, for the case of bipartite network, the set of non-observed links is different. This is due to the fact that not all possible pairs of nodes in a bipartite network can interact with each other.



## Results

| Method | Precision              | Recall                 | F-Score                |
|--------|------------------------|------------------------|------------------------|
| CN     | 0.0064 ± 0.0000        | 1.0000 ± 0.0000        | 0.0127 ± 0.0000        |
| JC     | 0.0350 ± 0.0117        | 0.3333 ± 0.1171        | 0.0633 ± 0.0211        |
| AA     | 0.0470 ± 0.0174        | 0.4333 ± 0.1693        | 0.0845 ± 0.0311        |
| RA     | 0.0476 ± 0.0185        | 0.4333 ± 0.1693        | 0.0856 ± 0.0332        |
| PA     | 0.0196 ± 0.0189        | 0.1556 ± 0.1589        | 0.0347 ± 0.0338        |
| LCL    | 0.0064 ± 0.0000        | 1.0000 ± 0.0000        | 0.0127 ± 0.0000        |
| CAR    | 0.0085 ± 0.0065        | <b>0.9444 ± 0.1757</b> | 0.0166 ± 0.0121        |
| CJC    | 0.0533 ± 0.0195        | 0.4000 ± 0.1304        | 0.0940 ± 0.0338        |
| CAA    | 0.0471 ± 0.0174        | 0.4333 ± 0.1693        | 0.0846 ± 0.0311        |
| CRA    | 0.0459 ± 0.0167        | 0.4333 ± 0.1693        | 0.0828 ± 0.0302        |
| CPA    | <b>0.0620 ± 0.0285</b> | 0.4333 ± 0.1693        | <b>0.1083 ± 0.0487</b> |
| PRA    | 0.0465 ± 0.0186        | 0.4333 ± 0.1693        | 0.0839 ± 0.0334        |

Table S2: Precision, Recall and F-Score for the NR dataset. The values are the average of 100 independent runs of the algorithm.

| Method | Precision              | Recall                 | F-Score                |
|--------|------------------------|------------------------|------------------------|
| CN     | 0.0984 ± 0.0145        | 0.4655 ± 0.0481        | 0.1623 ± 0.0221        |
| JC     | 0.0231 ± 0.0025        | 0.4014 ± 0.0291        | 0.0437 ± 0.0047        |
| AA     | 0.1426 ± 0.0147        | 0.4210 ± 0.0419        | 0.2130 ± 0.0216        |
| RA     | 0.1363 ± 0.0096        | 0.3966 ± 0.0278        | 0.2029 ± 0.0142        |
| PA     | 0.0465 ± 0.0063        | 0.1358 ± 0.0184        | 0.0693 ± 0.0094        |
| LCL    | 0.2353 ± 0.0060        | 0.6939 ± 0.0211        | 0.3515 ± 0.0091        |
| CAR    | 0.2013 ± 0.0125        | 0.5973 ± 0.0394        | 0.3010 ± 0.0184        |
| CJC    | 0.2311 ± 0.0081        | 0.6710 ± 0.0228        | 0.3437 ± 0.0119        |
| CAA    | 0.2422 ± 0.0076        | 0.7014 ± 0.0218        | 0.3601 ± 0.0113        |
| CRA    | 0.2487 ± 0.0095        | 0.7203 ± 0.0271        | 0.3698 ± 0.0141        |
| CPA    | 0.2041 ± 0.0132        | 0.5966 ± 0.0389        | 0.3041 ± 0.0195        |
| PRA    | <b>0.2716 ± 0.0100</b> | <b>0.7885 ± 0.0263</b> | <b>0.4041 ± 0.0145</b> |

Table S3: Precision, Recall and F-Score for the IC dataset. The values are the average of 100 independent runs of the algorithm.

| Method | Precision                             | Recall                                | F-Score                               |
|--------|---------------------------------------|---------------------------------------|---------------------------------------|
| CN     | 0.0553 $\pm$ 0.0031                   | <b>0.6297 <math>\pm</math> 0.0478</b> | 0.1016 $\pm$ 0.0053                   |
| JC     | 0.0383 $\pm$ 0.0116                   | 0.1578 $\pm$ 0.0507                   | 0.0616 $\pm$ 0.0188                   |
| AA     | 0.1584 $\pm$ 0.0126                   | 0.5250 $\pm$ 0.0411                   | 0.2433 $\pm$ 0.0193                   |
| RA     | 0.1586 $\pm$ 0.0133                   | 0.5266 $\pm$ 0.0442                   | 0.2438 $\pm$ 0.0204                   |
| PA     | 0.0514 $\pm$ 0.0143                   | 0.1750 $\pm$ 0.0459                   | 0.0795 $\pm$ 0.0218                   |
| LCL    | 0.0951 $\pm$ 0.0100                   | 0.5625 $\pm$ 0.0448                   | 0.1626 $\pm$ 0.0163                   |
| CAR    | 0.1492 $\pm$ 0.0106                   | 0.5000 $\pm$ 0.0329                   | 0.2299 $\pm$ 0.0161                   |
| CJC    | 0.1550 $\pm$ 0.0113                   | 0.5203 $\pm$ 0.0369                   | 0.2388 $\pm$ 0.0172                   |
| CAA    | 0.1592 $\pm$ 0.0132                   | 0.5297 $\pm$ 0.0426                   | 0.2448 $\pm$ 0.0201                   |
| CRA    | 0.1658 $\pm$ 0.0147                   | 0.5500 $\pm$ 0.0476                   | 0.2547 $\pm$ 0.0224                   |
| CPA    | 0.1506 $\pm$ 0.0102                   | 0.5000 $\pm$ 0.0329                   | 0.2315 $\pm$ 0.0155                   |
| PRA    | <b>0.1828 <math>\pm</math> 0.0164</b> | 0.6078 $\pm$ 0.0553                   | <b>0.2810 <math>\pm</math> 0.0253</b> |

Table S4: Precision, Recall and F-Score for the GPCR dataset. The values are the average of 100 independent runs of the algorithm.

| Method | Precision                             | Recall                                | F-Score                               |
|--------|---------------------------------------|---------------------------------------|---------------------------------------|
| CN     | 0.0439 $\pm$ 0.0027                   | 0.7348 $\pm$ 0.0290                   | 0.0828 $\pm$ 0.0050                   |
| JC     | 0.0506 $\pm$ 0.0029                   | 0.5174 $\pm$ 0.0239                   | 0.0922 $\pm$ 0.0052                   |
| AA     | 0.0732 $\pm$ 0.0027                   | 0.7420 $\pm$ 0.0275                   | 0.1333 $\pm$ 0.0049                   |
| RA     | 0.0761 $\pm$ 0.0025                   | 0.7737 $\pm$ 0.0286                   | 0.1385 $\pm$ 0.0047                   |
| PA     | 0.0295 $\pm$ 0.0030                   | 0.3007 $\pm$ 0.0300                   | 0.0538 $\pm$ 0.0055                   |
| LCL    | 0.0665 $\pm$ 0.0033                   | 0.7017 $\pm$ 0.0319                   | 0.1214 $\pm$ 0.0059                   |
| CAR    | 0.0658 $\pm$ 0.0043                   | 0.6928 $\pm$ 0.0363                   | 0.1202 $\pm$ 0.0076                   |
| CJC    | 0.0688 $\pm$ 0.0030                   | 0.6966 $\pm$ 0.0295                   | 0.1252 $\pm$ 0.0054                   |
| CAA    | 0.0739 $\pm$ 0.0024                   | 0.7468 $\pm$ 0.0255                   | 0.1345 $\pm$ 0.0044                   |
| CRA    | 0.0765 $\pm$ 0.0029                   | 0.7741 $\pm$ 0.0271                   | 0.1392 $\pm$ 0.0053                   |
| CPA    | 0.0683 $\pm$ 0.0035                   | 0.6898 $\pm$ 0.0352                   | 0.1244 $\pm$ 0.0063                   |
| PRA    | <b>0.0773 <math>\pm</math> 0.0033</b> | <b>0.7829 <math>\pm</math> 0.0325</b> | <b>0.1407 <math>\pm</math> 0.0060</b> |

Table S5: Precision, Recall and F-Score for the EZ dataset. The values are the average of 100 independent runs of the algorithm.

| Method      | Precision              | Recall                 | F-Score                |
|-------------|------------------------|------------------------|------------------------|
| CN          | 0.0848 ± 0.0013        | 0.1123 ± 0.0017        | 0.0966 ± 0.0014        |
| LCL         | 0.0783 ± 0.0010        | 0.1037 ± 0.0013        | 0.0893 ± 0.0011        |
| RA          | 0.0876 ± 0.0011        | 0.1159 ± 0.0015        | 0.0997 ± 0.0013        |
| AA          | 0.0868 ± 0.0013        | 0.1149 ± 0.0017        | 0.0989 ± 0.0014        |
| CRA         | 0.0798 ± 0.0012        | 0.1056 ± 0.0015        | 0.0909 ± 0.0013        |
| CAA         | 0.0794 ± 0.0011        | 0.1051 ± 0.0015        | 0.0905 ± 0.0013        |
| CPA         | 0.0814 ± 0.0011        | 0.1078 ± 0.0014        | 0.0928 ± 0.0012        |
| JC          | 0.0353 ± 0.0013        | 0.0468 ± 0.0017        | 0.0402 ± 0.0015        |
| PA          | 0.0760 ± 0.0012        | 0.1025 ± 0.0018        | 0.0873 ± 0.0015        |
| CAR         | 0.0814 ± 0.0011        | 0.1078 ± 0.0014        | 0.0928 ± 0.0012        |
| CJC         | 0.0636 ± 0.0011        | 0.0842 ± 0.0015        | 0.0725 ± 0.0013        |
| PRA         | 0.0929 ± 0.0013        | 0.1230 ± 0.0017        | 0.1058 ± 0.0015        |
| <b>PROP</b> | <b>0.1052 ± 0.0014</b> | <b>0.1393 ± 0.0018</b> | <b>0.1199 ± 0.0016</b> |

Table S6: Precision, Recall and F-Score for the MM1 dataset. The values are the average of 100 independent runs of the algorithm.

| Method      | Precision              | Recall                 | F-Score                |
|-------------|------------------------|------------------------|------------------------|
| CN          | 0.0451 ± 0.0019        | 0.0498 ± 0.0021        | 0.0474 ± 0.0020        |
| LCL         | 0.0430 ± 0.0018        | 0.0475 ± 0.0020        | 0.0452 ± 0.0019        |
| RA          | 0.0445 ± 0.0019        | 0.0492 ± 0.0021        | 0.0467 ± 0.0020        |
| AA          | 0.0446 ± 0.0019        | 0.0493 ± 0.0021        | 0.0468 ± 0.0020        |
| CRA         | 0.0434 ± 0.0018        | 0.0480 ± 0.0020        | 0.0456 ± 0.0019        |
| CAA         | 0.0433 ± 0.0018        | 0.0478 ± 0.0020        | 0.0454 ± 0.0019        |
| CPA         | 0.0435 ± 0.0018        | 0.0480 ± 0.0020        | 0.0457 ± 0.0019        |
| JC          | 0.0174 ± 0.0015        | 0.0192 ± 0.0017        | 0.0183 ± 0.0016        |
| PA          | 0.0358 ± 0.0015        | 0.0467 ± 0.0020        | 0.0406 ± 0.0017        |
| CAR         | 0.0435 ± 0.0018        | 0.0480 ± 0.0020        | 0.0457 ± 0.0019        |
| CJC         | 0.0428 ± 0.0019        | 0.0473 ± 0.0020        | 0.0449 ± 0.0019        |
| PRA         | 0.0443 ± 0.0019        | 0.0489 ± 0.0021        | 0.0465 ± 0.0019        |
| <b>PROP</b> | <b>0.0621 ± 0.0020</b> | <b>0.0686 ± 0.0022</b> | <b>0.0652 ± 0.0021</b> |

Table S7: Precision, Recall and F-Score for the MM2 dataset. The values are the average of 100 independent runs of the algorithm.

| Method      | Precision              | Recall                 | F-Score                |
|-------------|------------------------|------------------------|------------------------|
| CN          | 0.1346 ± 0.0023        | 0.0749 ± 0.0013        | 0.0963 ± 0.0016        |
| LCL         | 0.1020 ± 0.0020        | 0.0567 ± 0.0011        | 0.0729 ± 0.0014        |
| RA          | 0.1344 ± 0.0023        | 0.0747 ± 0.0013        | 0.0960 ± 0.0016        |
| AA          | 0.1343 ± 0.0023        | 0.0747 ± 0.0013        | 0.0960 ± 0.0017        |
| CRA         | 0.1063 ± 0.0019        | 0.0590 ± 0.0011        | 0.0759 ± 0.0014        |
| CAA         | 0.1044 ± 0.0018        | 0.0587 ± 0.0011        | 0.0751 ± 0.0014        |
| CPA         | 0.1208 ± 0.0021        | 0.0671 ± 0.0012        | 0.0863 ± 0.0015        |
| JC          | 0.0409 ± 0.0015        | 0.0227 ± 0.0009        | 0.0292 ± 0.0011        |
| PA          | 0.0744 ± 0.0013        | 0.0479 ± 0.0009        | 0.0583 ± 0.0011        |
| CAR         | 0.1208 ± 0.0021        | 0.0671 ± 0.0012        | 0.0863 ± 0.0015        |
| CJC         | 0.0734 ± 0.0018        | 0.0411 ± 0.0013        | 0.0527 ± 0.0015        |
| PRA         | 0.1423 ± 0.0020        | 0.0790 ± 0.0011        | 0.1016 ± 0.0014        |
| <b>PROP</b> | <b>0.1655 ± 0.0028</b> | <b>0.0919 ± 0.0015</b> | <b>0.1182 ± 0.0020</b> |

Table S8: Precision, Recall and F-Score for the MM3 dataset. The values are the average of 100 independent runs of the algorithm.

| Method      | MM1  |       |        |       | MM2 |      |      |      | MM3  |       |       |       |
|-------------|------|-------|--------|-------|-----|------|------|------|------|-------|-------|-------|
|             | TP   | TN    | FP     | FN    | TP  | TN   | FP   | FN   | TP   | TN    | FP    | FN    |
| CN          | 1942 | 28431 | 110385 | 15650 | 284 | 8678 | 6324 | 5686 | 1304 | 12217 | 8205  | 15829 |
| LCL         | 1814 | 28077 | 110739 | 15778 | 284 | 8689 | 6313 | 5686 | 962  | 11865 | 8557  | 16171 |
| RA          | 2007 | 28343 | 110473 | 15585 | 280 | 8685 | 6317 | 5690 | 1302 | 12213 | 8209  | 15831 |
| AA          | 1976 | 28360 | 110456 | 15616 | 280 | 8683 | 6319 | 5690 | 1303 | 12189 | 8233  | 15830 |
| CRA         | 1838 | 28269 | 110547 | 15754 | 283 | 8690 | 6312 | 5687 | 1009 | 11917 | 8505  | 16124 |
| CAA         | 1830 | 28219 | 110597 | 15762 | 279 | 8688 | 6314 | 5691 | 997  | 11796 | 8626  | 16136 |
| CPA         | 1860 | 28399 | 110417 | 15732 | 273 | 8682 | 6320 | 5697 | 1167 | 12080 | 8342  | 15966 |
| JC          | 849  | 25618 | 113198 | 16743 | 117 | 8515 | 6487 | 5853 | 398  | 11310 | 9112  | 16735 |
| PA          | 1773 | 22021 | 116795 | 15819 | 278 | 7501 | 7501 | 5692 | 829  | 10211 | 10211 | 16304 |
| CAR         | 1860 | 28401 | 110415 | 15732 | 273 | 8682 | 6320 | 5697 | 1167 | 12080 | 8342  | 15966 |
| CJC         | 1471 | 27846 | 110970 | 16121 | 273 | 8682 | 6320 | 5697 | 730  | 11510 | 8912  | 16403 |
| PRA         | 2139 | 28257 | 110559 | 15453 | 284 | 8692 | 6310 | 5686 | 1366 | 12280 | 8142  | 15767 |
| <b>PROP</b> | 2387 | 29081 | 109735 | 15205 | 405 | 8814 | 6188 | 5565 | 1577 | 12491 | 7931  | 15556 |

Table S9: True Positive, False Positive, False Negative, and True Negative values for the three multimorbidity datasets.

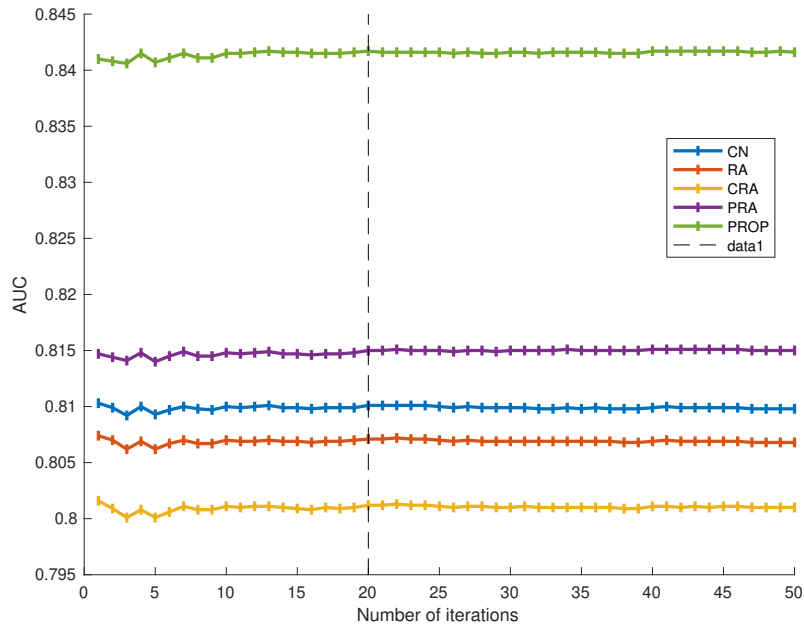

Figure S3: The average performance of five different methods on the MM2 dataset, measured by AUC for different number of runs. We can observe that there is very low variation in the AUC values and the results are stable after around 20 iterations. For visualization purposed, we have only included the results of the two proposed and three state-of-the art algorithms. We have observed that all the remaining indices follow a similar trend. These results are for the smallest size multimorbidity dataset. The performances of the proposed and alternate methods on the remaining datasets also converge around 20 iterations.



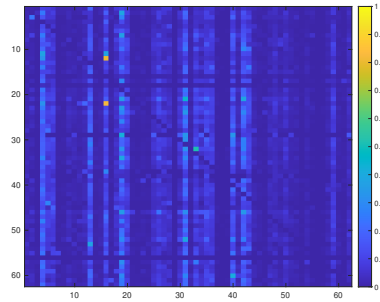

(a) MM2

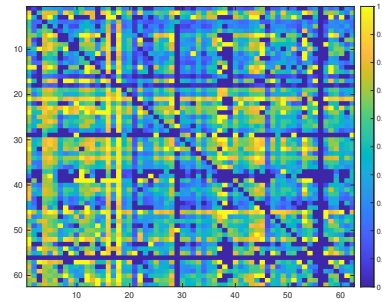

(b) MM2

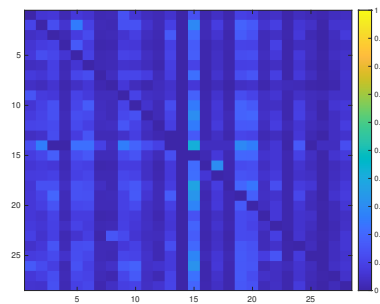

(c) MM3

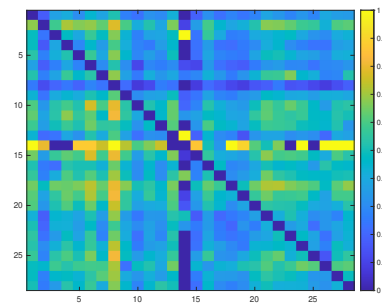

(d) MM3

Figure S4: Each matrix entry,  $M(i, j)$ , represents the conditional probability  $Pr(patient = j | patient = i)$ , ie., the probability that a patient is diagnosed with a disease  $j$ , given that he was already suffering from disease  $i$ . Left columns plot data for all patients, while in right columns, only those patients are considered who were diagnosed with both the diseases  $i$  and  $j$ . In other words, given that a patient has been diagnosed with both diseases  $i$  and  $j$ , how likely is that the patient was diagnosed with disease  $i$  before the patient was diagnosed with disease  $j$ . Warmer colors represent a higher probability.

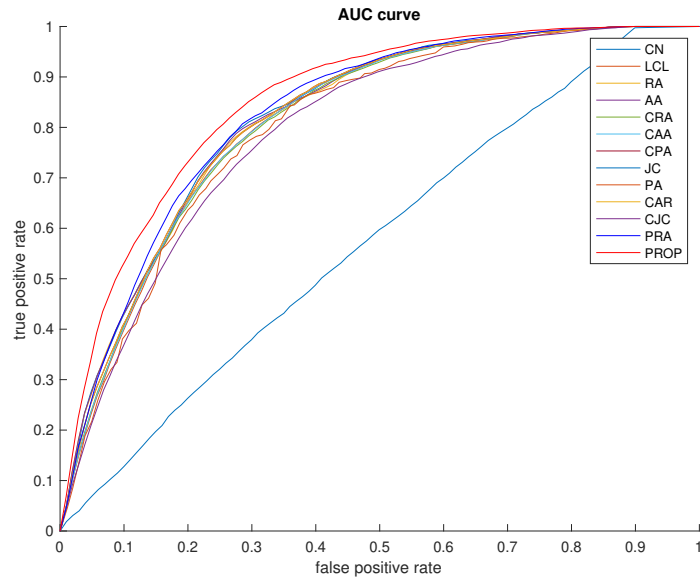

(a) MM2

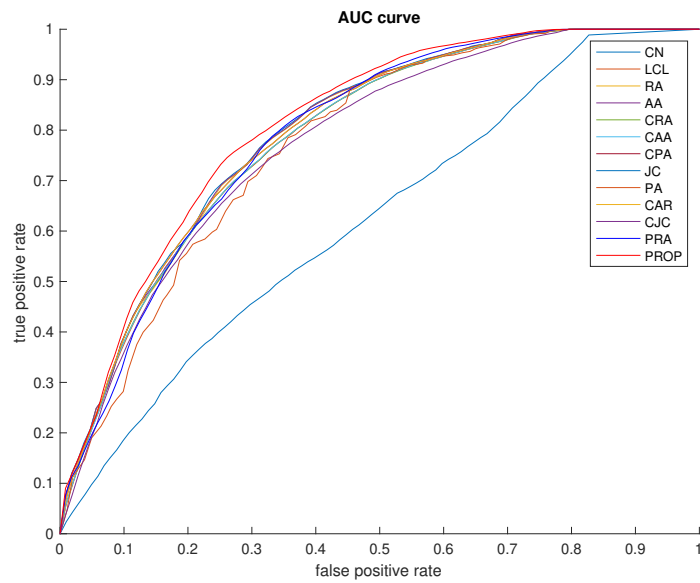

(b) MM3

Figure S5: Receiver operating characteristic curve for the performance of link prediction in datasets MM2 and MM3.

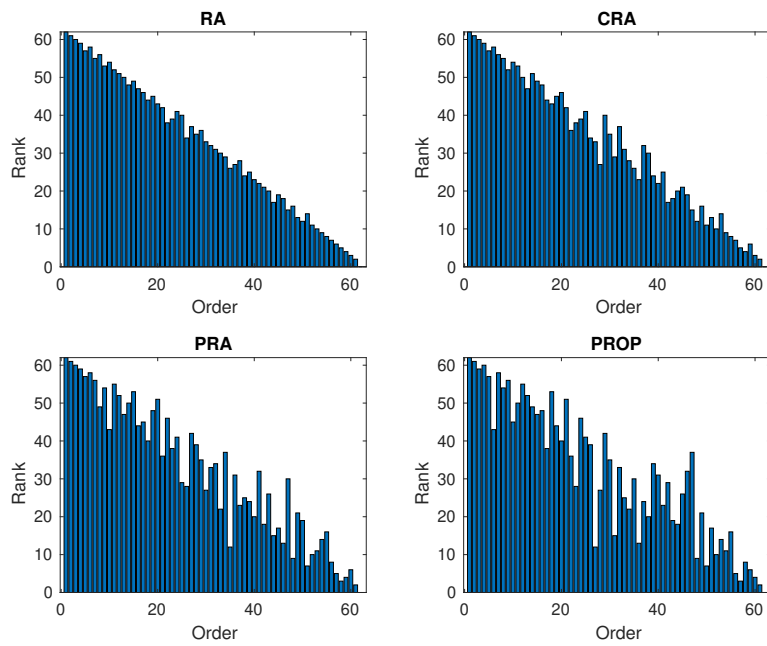

Figure S6: Prediction of new diseases for the multimorbidity dataset MM2. The x-axis shows the time when a new disease is predicted for the first time, while the y-axis shows the rank of the predicted disease when sorted using degree of disease in the network.

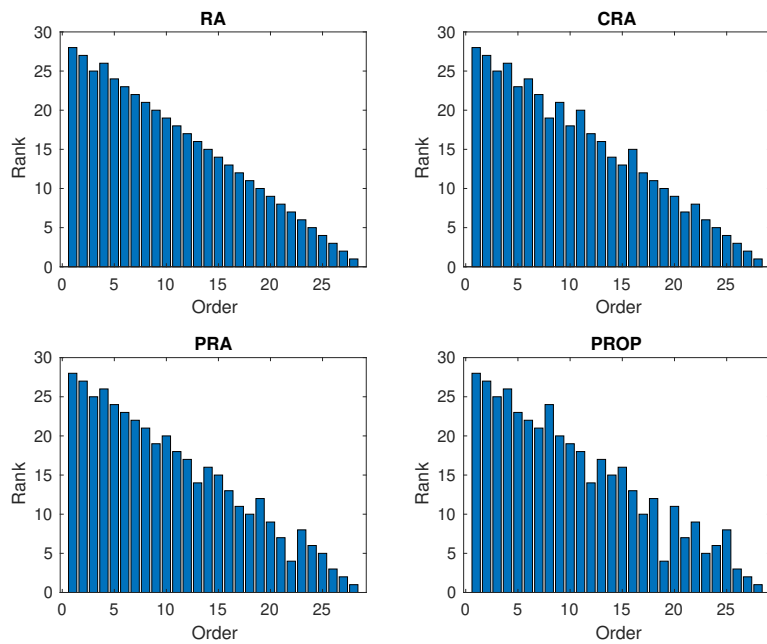

Figure S7: Prediction of new diseases for the multimorbidity dataset MM3. The x-axis shows the time when a new disease is predicted for the first time, while the y-axis shows the rank of the predicted disease when sorted using degree of disease in the network.

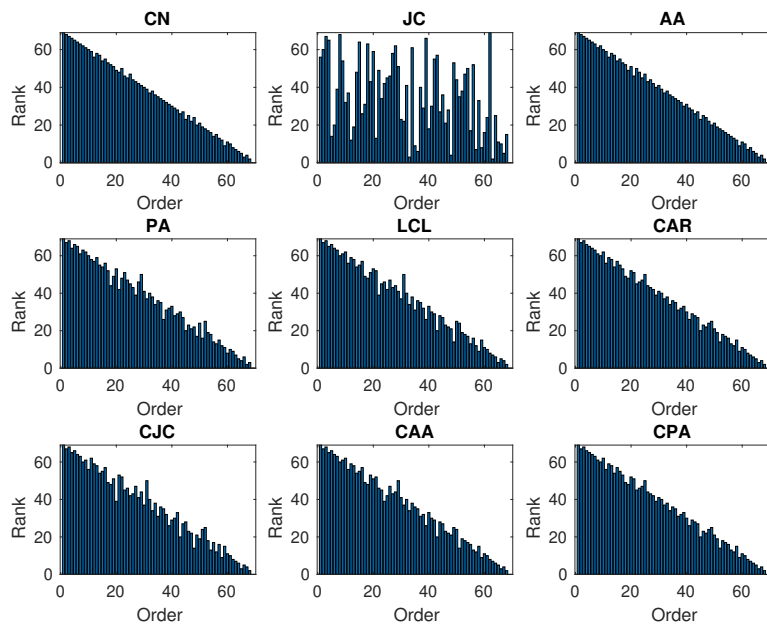

Figure S8: Prediction of new diseases for the multimorbidity dataset MM1. The x-axis shows the time when a new disease is predicted for the first time, while the y-axis shows the rank of the predicted disease when sorted using degree of disease in the network.

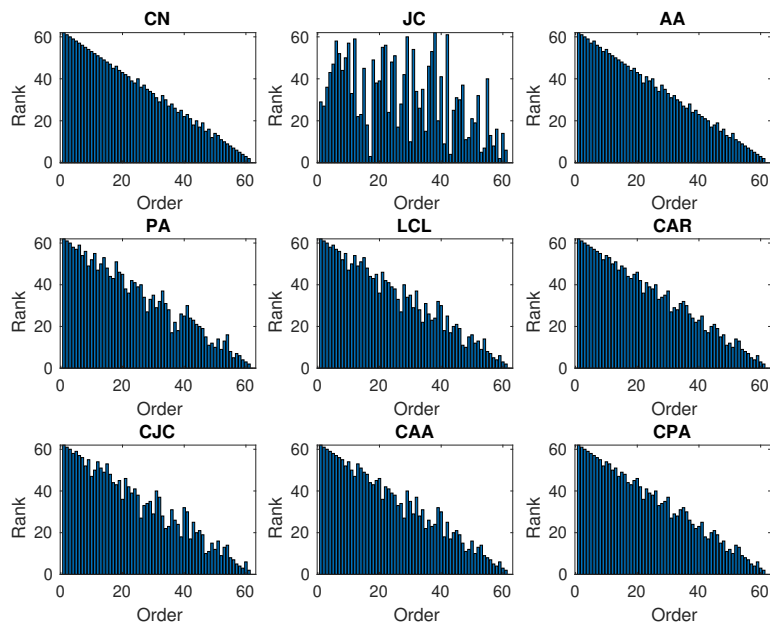

Figure S9: Prediction of new diseases for the multimorbidity dataset MM2. The x-axis shows the time when a new disease is predicted for the first time, while the y-axis shows the rank of the predicted disease when sorted using degree of disease in the network.

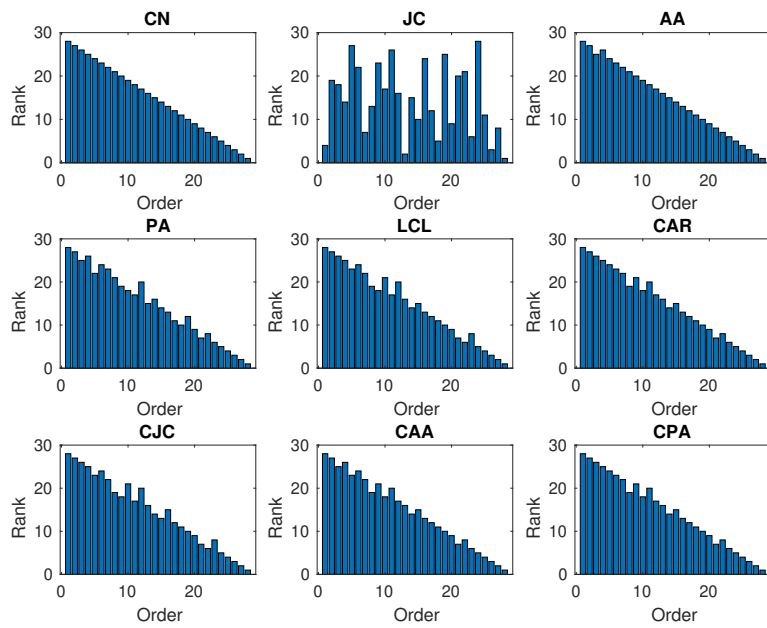

Figure S10: Prediction of new diseases for the multimorbidity dataset MM3. The x-axis shows the time when a new disease is predicted for the first time, while the y-axis shows the rank of the predicted disease when sorted using degree of disease in the network.

---

Multimorbidity dataset 1

---

Anxiety disorders (4197), Aplastic anaemias (333), Asthma (9544), Atrial fibrillation (8643), Bronchiectasis (1425), COPD (7200), Chronic sinusitis (798), Crohn’s disease (591), Dementia (981), Depression (6432), Dermatitis (atopc/contact/other/unspecified) (1141), Diabetes (11022), Epilepsy (1707), Female pelvic inflammatory disease (1006), Glaucoma (1673), Heart failure (5289), Hyperparathyroidism (465), Hyperplasia of prostate (4546), Hypertension (26167), Hypo or hyperthyroidism (5854), Iron deficiency anaemia (4370), Irritable bowel syndrome (2315), Ischaemic stroke (2274), Liver fibrosis, sclerosis and cirrhosis (752), Meningitis (84), Migraine (1156), Multiple sclerosis (328), Myocardial infarction (8066), Osteoporosis (3632), Parkinson’s disease (643), Primary malignancy Bladder (1146), Primary malignancy bone and articular cartilage (84), Primary malignancy brain, other CNS and Intracranial (229), Primary malignancy breast (2885), Primary malignancy cervical (79), Primary malignancy kidney and ureter (712), Primary malignancy liver (216), Primary malignancy lung and trachea (1881), Primary malignancy malignant melanoma (628), Primary malignancy mesothelioma (133), Primary malignancy multiple independent sites (176), Primary malignancy oesophageal (532), Primary malignancy Oropharyngeal (434), Primary malignancy other organs (2230), Primary malignancy other skin and subcutaneous tissue (3016), Primary malignancy ovarian (560), Primary malignancy pancreatic (438), Primary malignancy prostate (2190), Primary malignancy stomach (454), Primary malignancy testicular (51), Primary malignancy thyroid (145), Primary malignancy uterine (482), Primary malignancy biliary tract (239), Primary malignancy colorectal and anus (2230), Rheumatoid arthritis (2257), Schizophrenia, schizotypal and delusional disorders (473), Secondary malignancy adrenal gland (379), Secondary malignancy bone (2279), Secondary malignancy bowel (262), Secondary malignancy brain. Other CNS and intracranial (927), Secondary malignancy lung (2124), Secondary malignancy lymph nodes (4026), Secondary malignancy other organs (1681), Secondary malignancy pleura (688), Secondary malignancy retroperitoneum and peritoneum (1367), Stable angina (10426), Stroke NOS (1392), Tuberculosis (133), Unstable angina (3825).

---

Table S10: List of unique diseases in multi-morbidity dataset (MM1) along with count of number of patients that are diagnosed with that disease. There are a total of 69 unique diseases in this network.



---

Multimorbidity dataset 2

---

Acuterenalfailure (227), Alcoholdependence (713), Alcoholliverdisease (76), Asthmalonglist (2983), Atrialfibrillation (1222), Atriskoffalls (1367), Bipolar (158), Bladdercancer (134), Benign Prostatic Hyperplasia (562), Breastcancer (460), Bronchiectasis (214), Chronicbronchitis (367), Ckd (2519), Coeliac (151), Colorectalcancer (245), Chronic obstructive pulmonary disease (1463), Crohn (142), Dementia (571), Depression (5114), Diverticularisease (1813), Duodenalulcer (577), Emphysem (90), Epilepsy (413), Gastriculcer (175), Glaucoma (965), Gord (2050), Gout (1083), Heartfailure (635), Human immunodeficiency virus (12), Hyperlipidaemia (1651), Hypertension (6035), Hyperthyroidismdirty (444), Hypothyroidismdirty (2057), Irritable bowel syndrome (1877), Ischaemic heart disease (2192), Irondef (1492), Lungcancer (56), Multiplemyelomdirty (27), Multiplesclerosis (80), Nontypediabates (2796), Obesitydirty (753), Osteoarthritis (4157), Osteoporosis (1588), Pacemaker (277), Parkinsonsdiseasev (123), Pepticulcerdirty (193), Peripheralvascularisease (522), Pneumonidirty (820), Prostatecancerdirty (336), Psoriasis (1128), Pulmonaryembolismdirty (399), Renalcolicdirty (533), Renalcancerdirty (46), Rheumatoidarthritis (350), Schizophrenia (143), Sicklecelldisease (0), Systemic lupus erythematosus (68), Sleepapnoea (333), Strokeandtia (1519), Typediabates (256), Ulcerativecolitis (164), Venous thromboembolism (780).

---

Table S11: List of unique diseases in multi-morbidity dataset (MM2) along with count of number of patients that are diagnosed with that disease. There are a total of 62 unique diseases in this network.

---

Multimorbidity dataset 3

---

Hypertension (28891), Ischaemic heart disease (17933), Diabetes (13037), Malignant neoplasms (13016), Asthma (10720), Atrial fibrillation (10487), Chronic bronchitis (8341), Depression (7508), Heart failure (6682), Chronic kidney disease (6553), Hypothyroidism (6352), Peripheral vascular disease (5388), Anxiety (4816), Stroke (transient ischaemic attack) (4729), Osteoporosis (4232), Duodenal and gastric ulcer (3790), Sleep apnoea (3035), Rheumatoid arthritis (2706), Osteoarthritis (2619), Epilepsy (1977), Bronchiectasis (1672), Inflammatory bowel disease (1571), Chronic liver disease (1564), Hyperthyroidism (1225), Dementia (1125), Parkinsons disease (781), Severe mental illness (549), Human immunodeficiency virus (31).

---

Table S12: List of unique diseases in multi-morbidity dataset (MM3) along with count of number of patients that are diagnosed with that disease. There are a total of 28 unique diseases in this network.

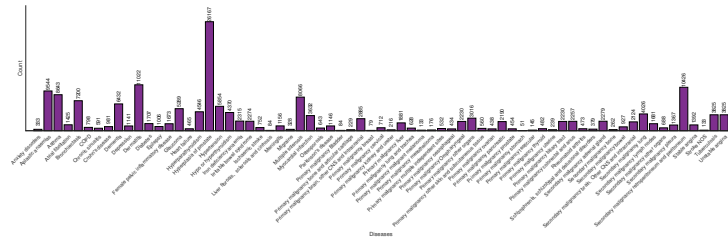

(a) MM1

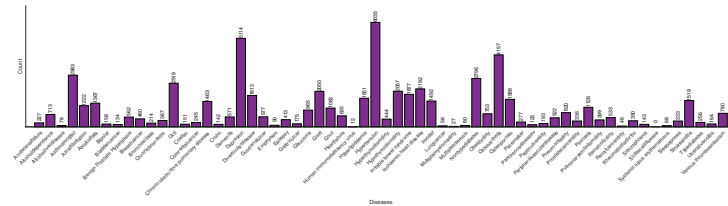

(b) MM2

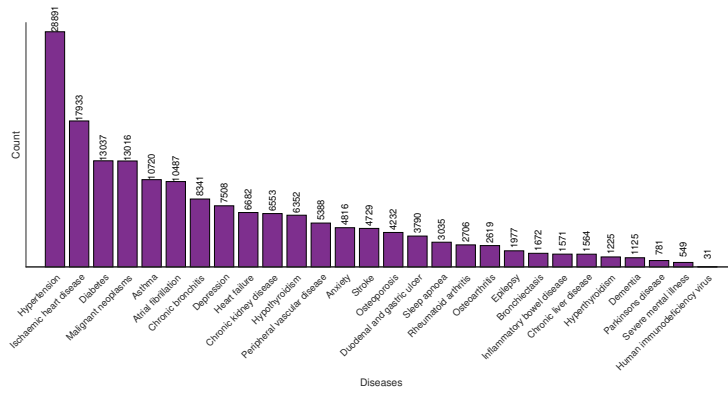

(c) MM3

Figure S11: Bar chart of number of patients for each unique diseases in all the multi-morbidity datasets.
